# Supplementary material
Source: MDPI journal article supplement (https://www.mdpi.com/2071-1050/11/4/1088)
Supplement: s1 [file s1]

## Supplemental Materials

**Figure S1.** Biometabolites identified by GC-MS. AW=aqueous samples; NS=soil-attached samples: N2 present the biodegradation samples at the 14 day.

(a)phenanthrene; (b) catechol; (c) dibenzothiophene; (d) 4-Carboxy-5-phenanthrenecarboxaldehyde; (e) cyclopentaphenanthren; (f) 4,4'-Bipyrimidine.

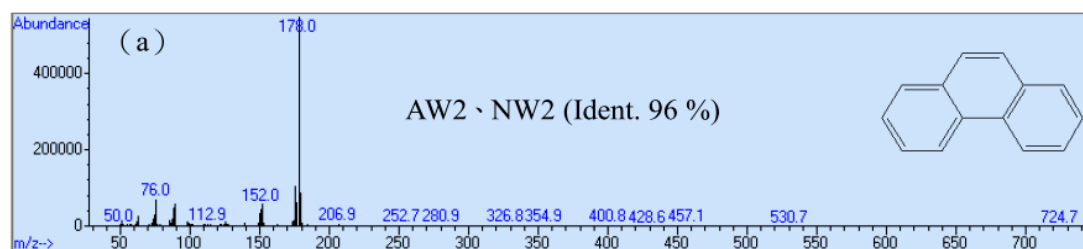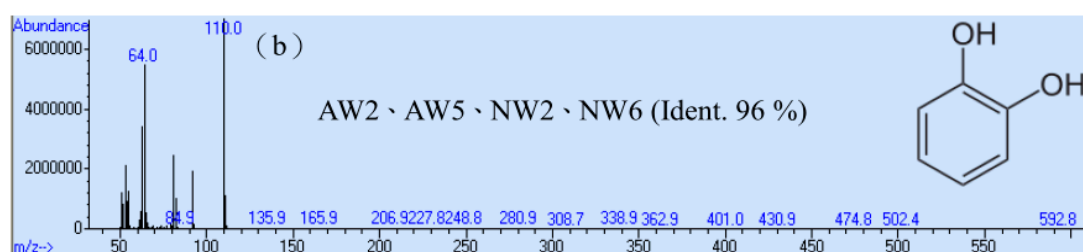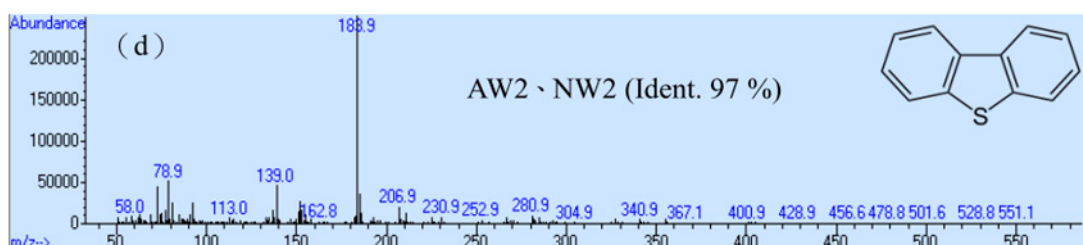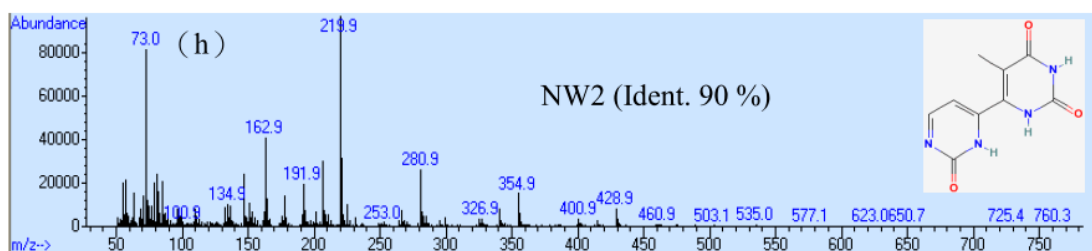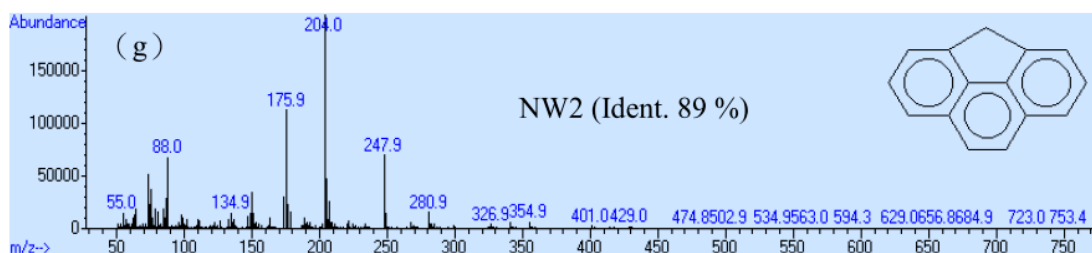

**Figure S2.** Responses to dioxygenases encoding target functional genes in PYR biodegradation in the ABR.

N : negative ; 1 : chemostat N ; 2 : N<sub>2000</sub> ; M : Marker ; 3 : N0W 、 4 : N0S 、 5 : N2W 、 6 : N2S 、 7 : N4W 、 8 : N4S 、 9 : N5W 、 10 : N5S 、 11 : N6W 、 12 : N6S

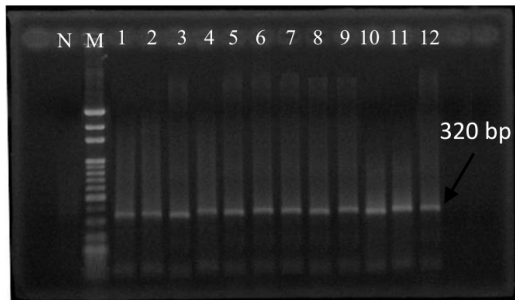

Aromatic Ring-hydroxylating  
dioxygenase (RHD $\alpha$ )

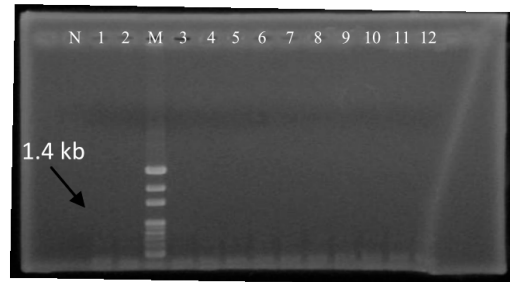

Naphthalene inducible  
Pyrene dioxygenase gene (Nid A)

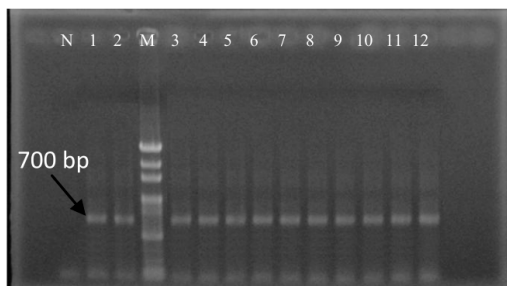

Rieske domain (Rf)

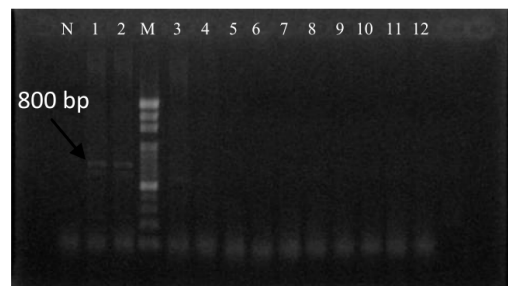

Protocatechuate (P34O)

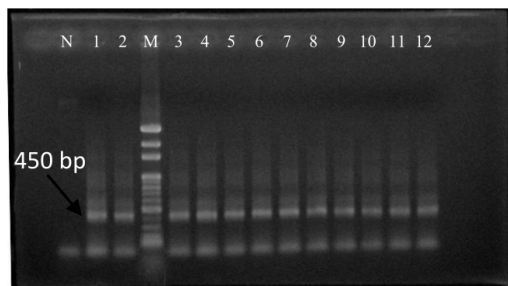

Catechol 2,3-dioxygenase (C23O)
